# Supplementary material for: Interplay between Endoplasmic Reticulum (ER) Stress and Autophagy Induces Mutant p53H273 Degradation
Source: PubMed Central journal article supplement (PMC7175121; doi:10.3390/biom10030392), 2020-03-03
Supplement: biomolecules-10-00392-s001.pdf [file biomolecules-10-00392-s001.pdf]

# Interplay between Endoplasmic Reticulum (ER) Stress and Autophagy Induces Mutant p53H273 Degradation

Alessia Garufi <sup>1,2</sup>, Giulia Federici <sup>1</sup>, Maria Saveria Gilardini Montani <sup>3</sup>, Alessandra Crispini <sup>4</sup>, Mara Cirone <sup>3</sup> and Gabriella D'Orazi <sup>1,\*</sup>

**Figure 1C, U373  
actin**

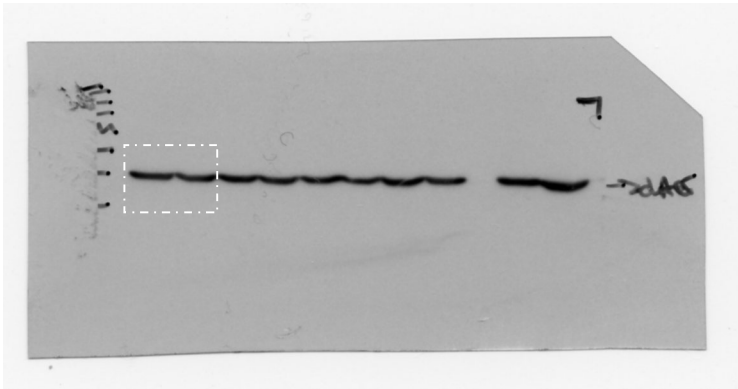

**Figure 1C, HT29  
actin**

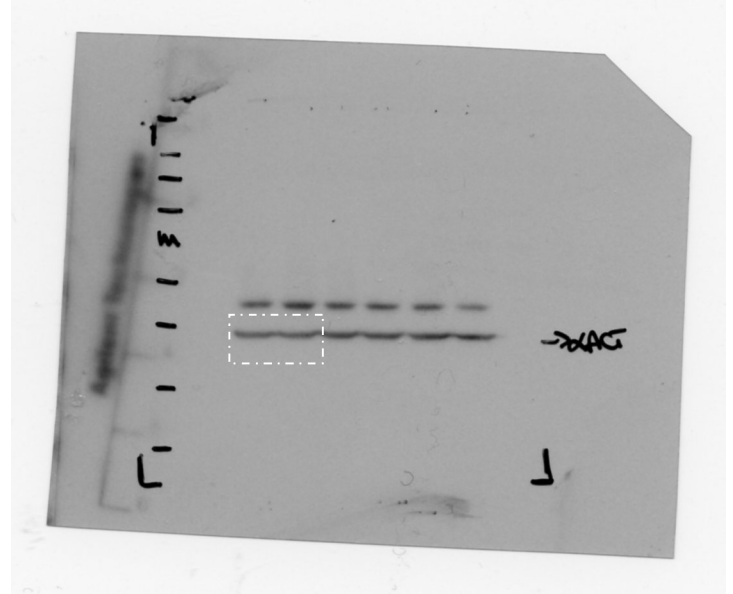

**Figure 1E, U373  
28S**

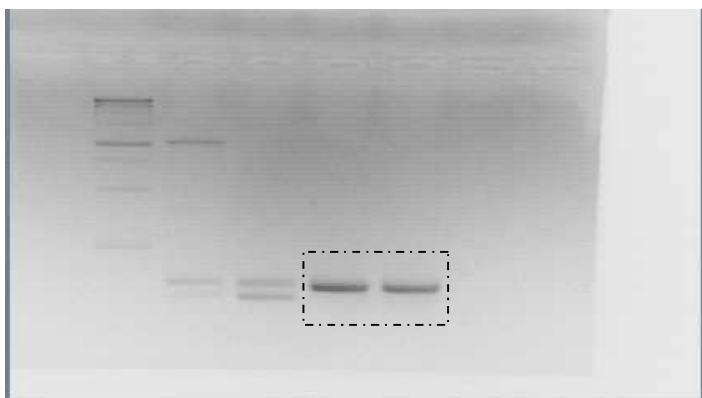

**Figure 1F, U373  
28S**

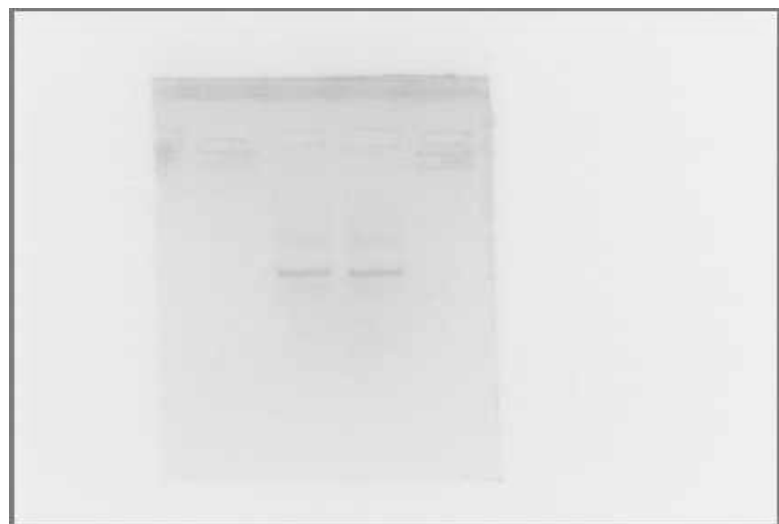

**Figure 1F, U373**  
**p53**

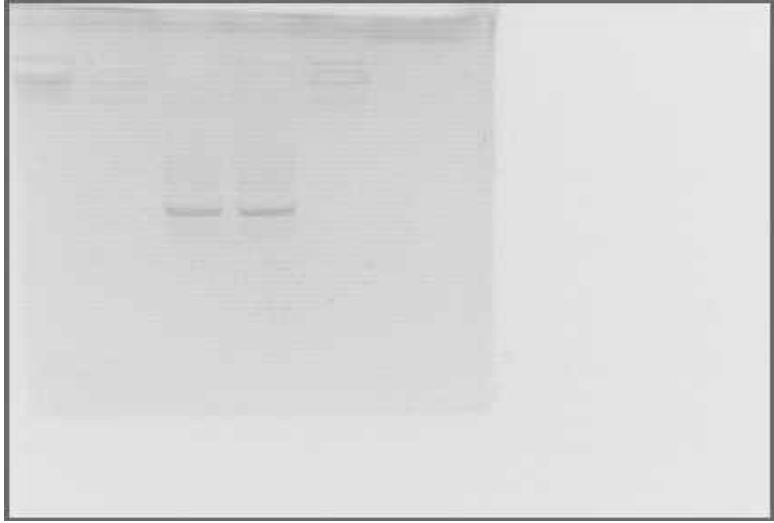

**Figure 1F, HT29**  
**p53**

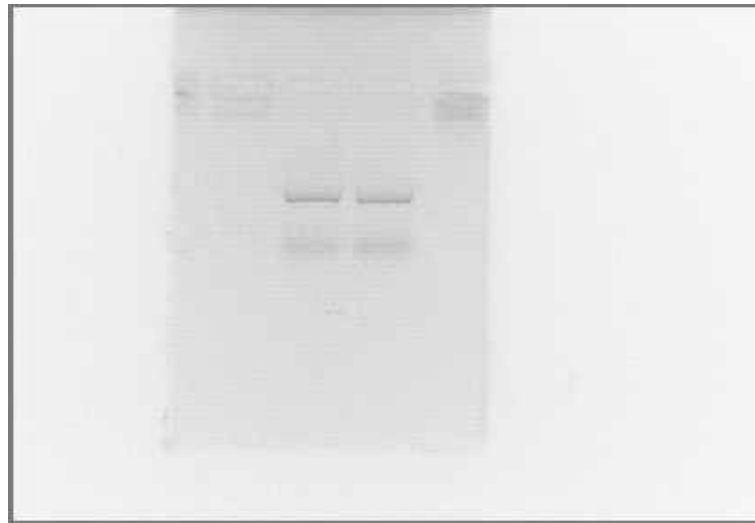

**Figure 1F, U373**  
**28S**

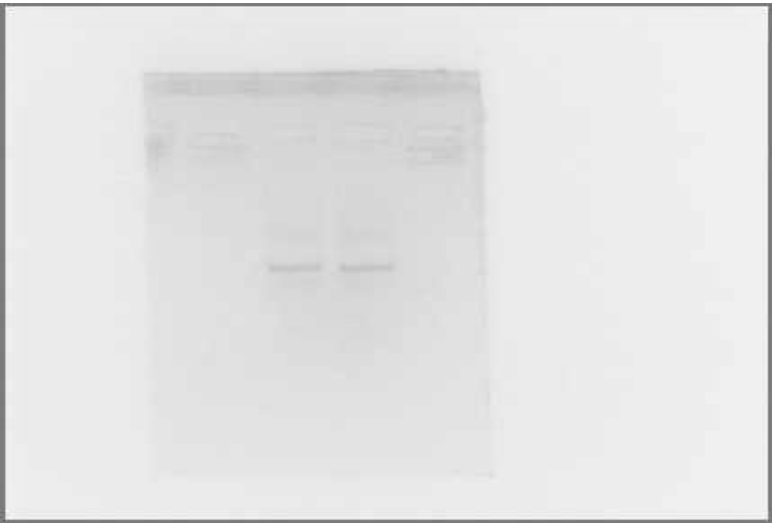

**Figure 1F, HT29**  
**28S**

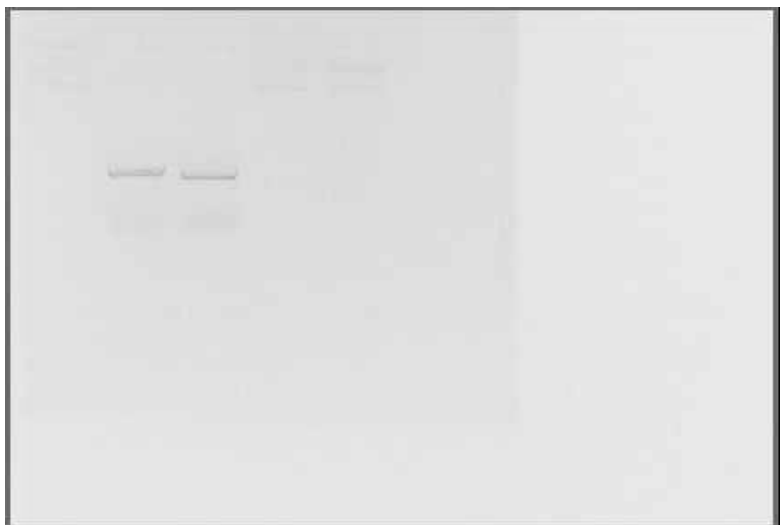

**Figure 2B, RKO**  
actin

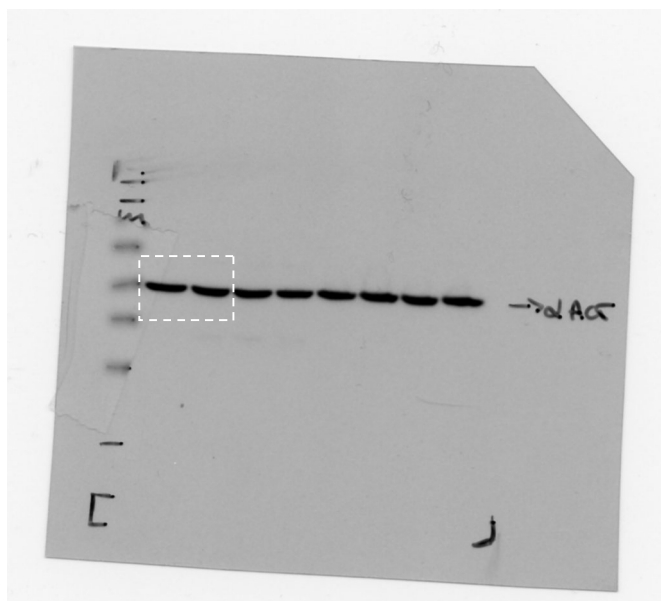

**Figure 2B, HCT116**  
actin

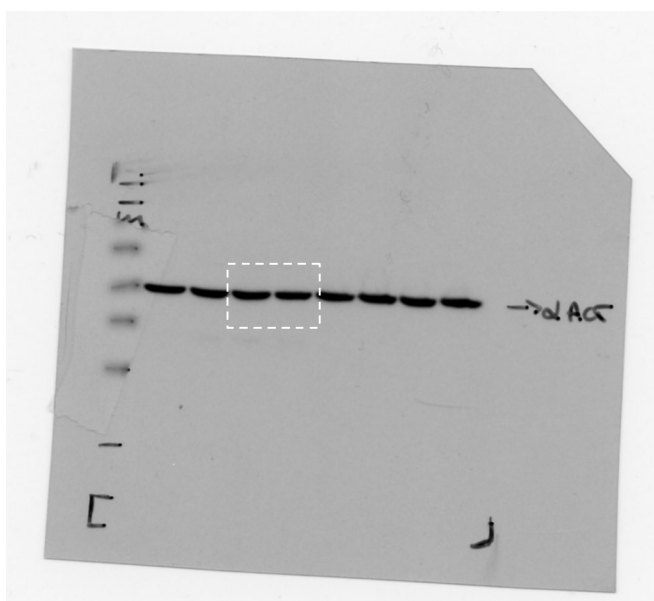

**Figure 3C**  
28S

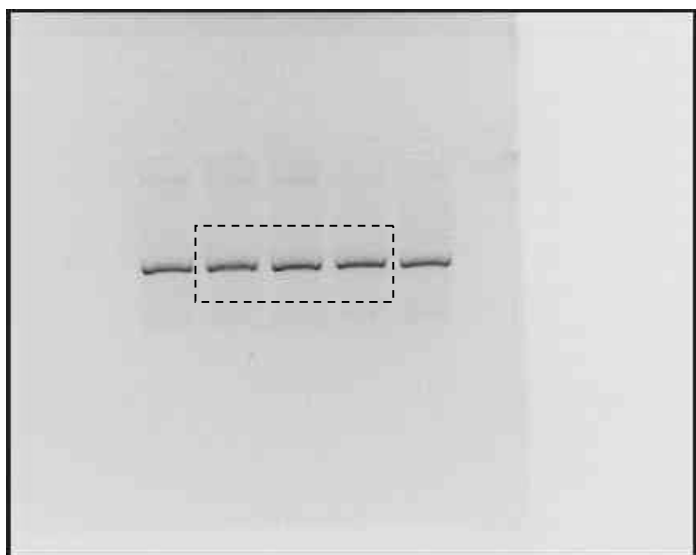

**Figure 4A**  
**28S**

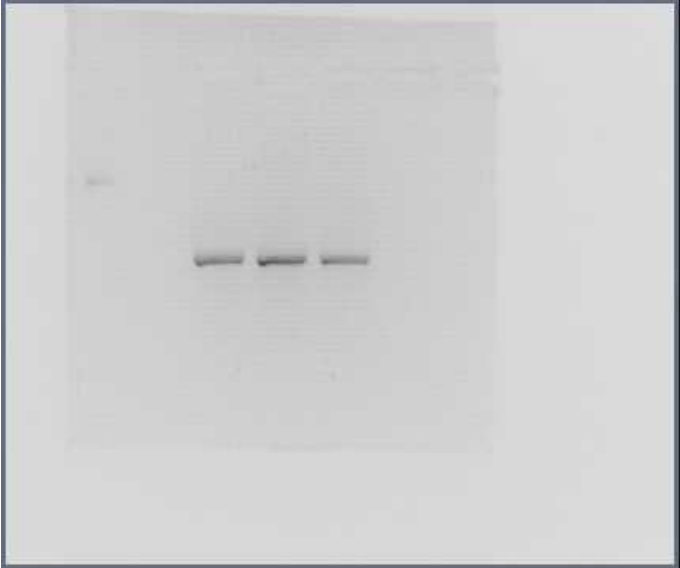

**Figure 4B**  
**actin**

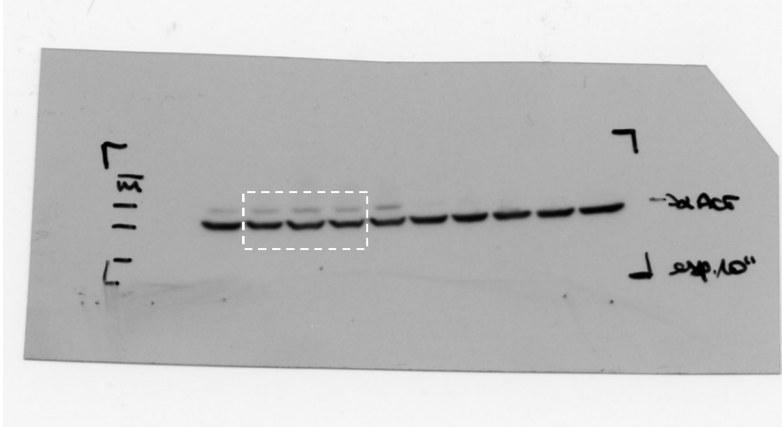

**Figure 6B**  
**actin**

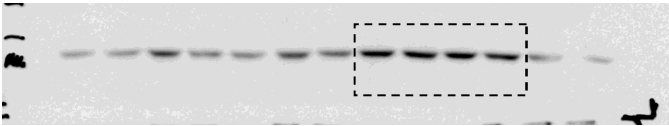

| U373     | subG1 |     |      |  |
|----------|-------|-----|------|--|
| Mock     | 2     |     |      |  |
|          | 2     |     |      |  |
| Zn       | 20    | 22  | 2,83 |  |
|          | 24    |     |      |  |
| Zn+4-BPA | 8     | 7   | 1,41 |  |
|          | 6     |     |      |  |
| Zn+STF   | 9     | 7,5 | 2,12 |  |
|          | 6     |     |      |  |
| Zn+PFT   | 9     | 7,5 | 2,12 |  |
|          | 6     |     |      |  |

| HT29     | subG1 |     |  |
|----------|-------|-----|--|
| Mock     | 2     |     |  |
|          | 2     |     |  |
| Zn       | 22    | 23  |  |
|          | 24    |     |  |
| Zn+4-BPA | 12    | 10  |  |
|          | 8     |     |  |
| Zn+STF   | 10    | 8   |  |
|          | 6     |     |  |
| Zn+PFT   | 9     | 7,5 |  |
|          | 6     |     |  |

1,41

2,83

2,83

2,12
